# Supplementary material for: Role of Oxygen Vacancies in the Electrical Properties of WO3−x Nano/Microrods with Identical Morphology
Source: Hindawi journal article supplement (doi:10.1155/2018/7802589), 2018-01-01
Supplement: f1 [file 7802589.f1.zip]

Archive with 13 entries (13 files):
- 7802589_SupplDesc.docx
- Fig.S1.eps
- Fig.S2.eps
- Fig.S3a.eps
- Fig.S3b.eps
- Fig.S3c.eps
- Fig.S3d.eps
- Fig.S3e.eps
- Fig.S3f.eps
- Fig.S4.eps
- Fig.S5a.eps
- Fig.S5b.eps
- mat.7802589.v3.doc
