# Supplementary material for: Role of Oxygen Vacancies in the Electrical Properties of WO3−x Nano/Microrods with Identical Morphology
Source: Hindawi journal article supplement (doi:10.1155/2018/7802589), 2018-01-01
Supplement: f1 [file 7802589.f1.zip › 7802589_SupplDesc.docx]

**Supplementary Materials**

The composition, structure and morphology of WO3-x nanomaterials. The response-recovery characteristic curves and response-recovery times of the sensors fabricated with the obtained WO3−x crystals.

Fig. S1. XRD patterns of the samples synthesized by thermal evaporation of 1 g WO3 powder with different amounts of S powder at 1150 °C. These results reveal that the obtained samples consist of tungsten oxides (WO3-x) with different contents of oxygen vacancies.

Fig. S2. Full spectra of the samples synthesized by thermal evaporation of 1 g WO3 powder with different amounts of S powder at 1150 °C: (a) 0.1, (b) 0.15, (c) 0.2, (d) 0.25, (e) 0.3, and (f) 0.5 g. It can be seen that all the samples elementally consist of W and O (please also check Table S1).

Fig. S3. Typical SEM images of the samples synthesized by thermal evaporation of 1 g WO3 powder with different amounts of S powder at 1150 °C: (a) 0.1, (b) 0.15, (c) 0.2, (d) 0.25, (e) 0.3, and (f) 0.5 g. It can be seen that all the samples almost have identical morphology.

Fig. S4. N2 adsorption–desorption isotherms of the obtained WO3-x samples. The isotherms are characteristic of a type IV isotherm with a type H3 hysteresis loop, indicating that they are mesoporous structures in the samples. The BET surface areas of the WO3, WO2.90, W19O55 and W18O49 samples were determined approximately as 1.18, 1.06, 1.03 and 0.95 m2/g, while the volume of the adsorbed N2 by them under the relative pressure of 1.0 were 1.41, 2.13, 2.40 and 4.70 cm3/g, respectively.

Fig. S4. N2 adsorption–desorption isotherms of the obtained WO3-x samples. The isotherms are characteristic of a type IV isotherm with a type H3 hysteresis loop, indicating that they are mesoporous structures in the samples. The BET surface areas of the WO3, WO2.90, W19O55 and W18O49 samples were determined approximately as 1.18, 1.06, 1.03 and 0.95 m2/g, while the volume of the adsorbed N2 by them under the relative pressure of 1.0 were 1.41, 2.13, 2.40 and 4.70 cm3/g, respectively. Zhenguang Shen, et al., Journal of Nanomaterials.

Fig. S5. Response-recovery characteristic curves (a), and response-recovery times (b) of the sensors fabricated with the obtained WO3−x crystals.

Table S1 Table 1 The content of W ions in the obtained tungsten oxides samples determined by XPS and their average/theoretical average oxidation number of W.
